# Supplementary material for: Ammonium ion intercalation and oxygen-rich vacancies in birnessite-type MnO2 for supercapacitors and oxygen evolution applications
Source: Royal Society of Chemistry journal article supplement (doi:10.1039/d4nj02629b), 2024-01-01
Supplement: d4nj02629b1.pdf [file d4nj02629b1.pdf]

## Supplementary Information

# Ammonium ion intercalation and oxygen-rich vacancies in birnessite-type MnO<sub>2</sub> for supercapacitor and oxygen evolution applications

*Juyin Liu, Xiaoze Ren, Yanfang Gao\*, Ling Liu\*,<sup>II</sup>*

*\*School of Chemical Engineering, Inner Mongolia University of Technology, Hohhot*

*010051, P. R. China*

*Engineering Research Center of Large Energy Storage Technology*

*\* E-mail addresses: [yf\\_gao@imut.edu.cn](mailto:yf_gao@imut.edu.cn)*

*\*, II E-mail addresses: [ll@imut.edu.cn](mailto:ll@imut.edu.cn)*

## **Experimental Procedures**

### **Chemicals and reagents**

Potassium permanganate ( $\text{KMnO}_4$ ) was purchased from Tianjin Damao Chemical Reagent Co., Ltd. Ammonium chloride ( $\text{NH}_4\text{Cl}$ ) was purchased from Aladdin Reagent (Shanghai) Co., Ltd. Lithium sulphate ( $\text{Li}_2\text{SO}_4$ ) was purchased from Aladdin Reagent (Shanghai) Co., Ltd. Nickel foam (NF) was purchased from Taiyuan Lizhiyuan Technology Co., Ltd. All reagents were directly used without further purification. All solutions were prepared using ultrapure water.

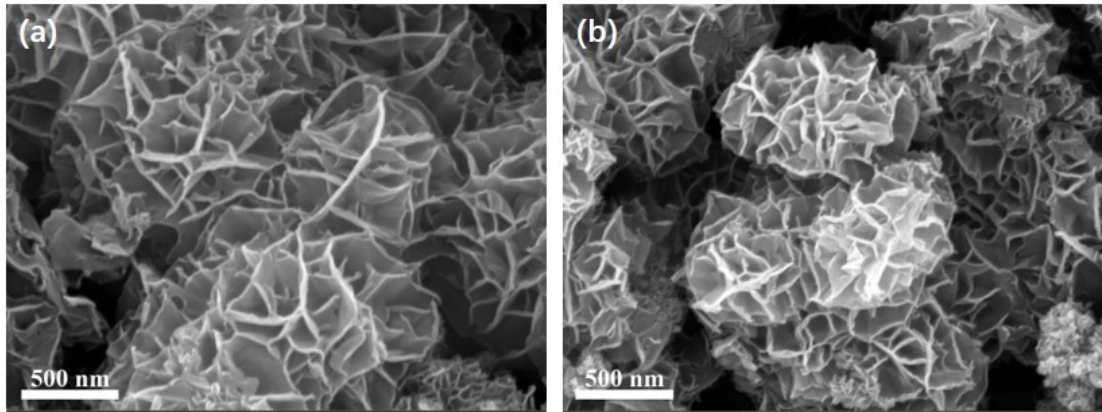

**Fig. S1.** SEM images of (a) 0.5 M-A-MnO<sub>2</sub>. (b) 2 M-A-MnO<sub>2</sub>.

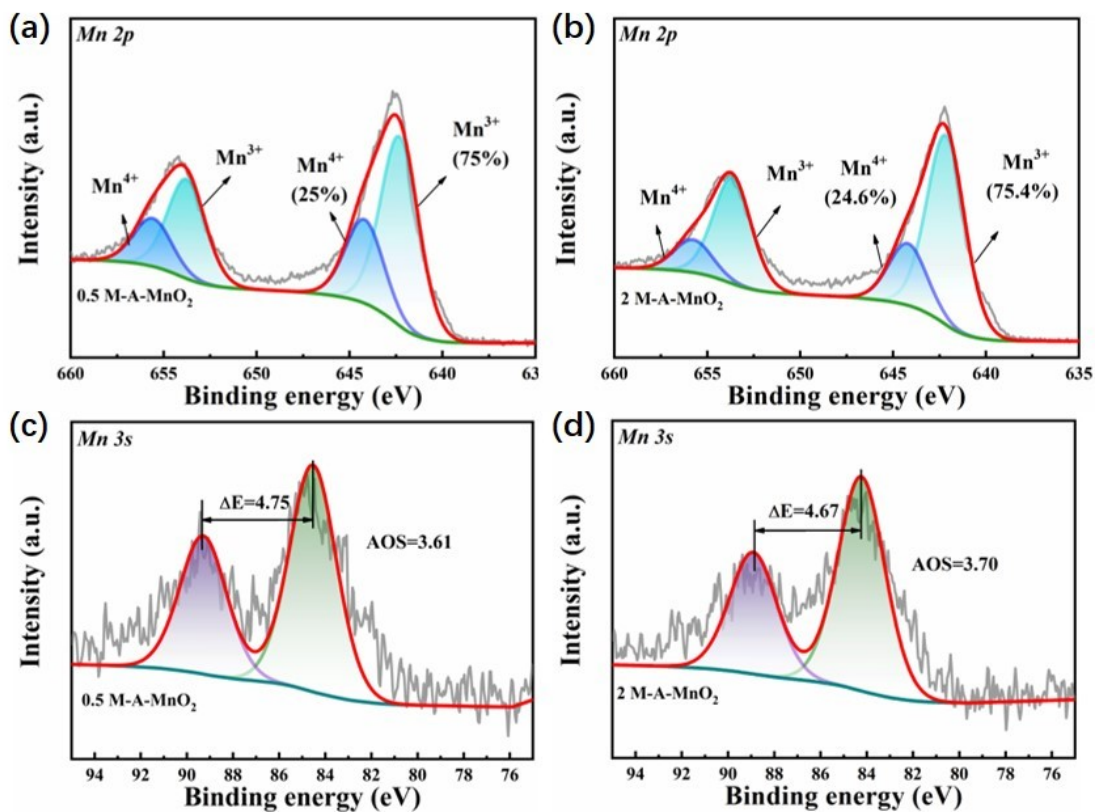

**Fig. S2.** (a-b) Mn 2p spectra of 0.5 M-A-MnO<sub>2</sub> and 2 M-A-MnO<sub>2</sub>. (c-d) Mn 3s spectra of 0.5 M-A-MnO<sub>2</sub> and 2 M-A-MnO<sub>2</sub> samples.

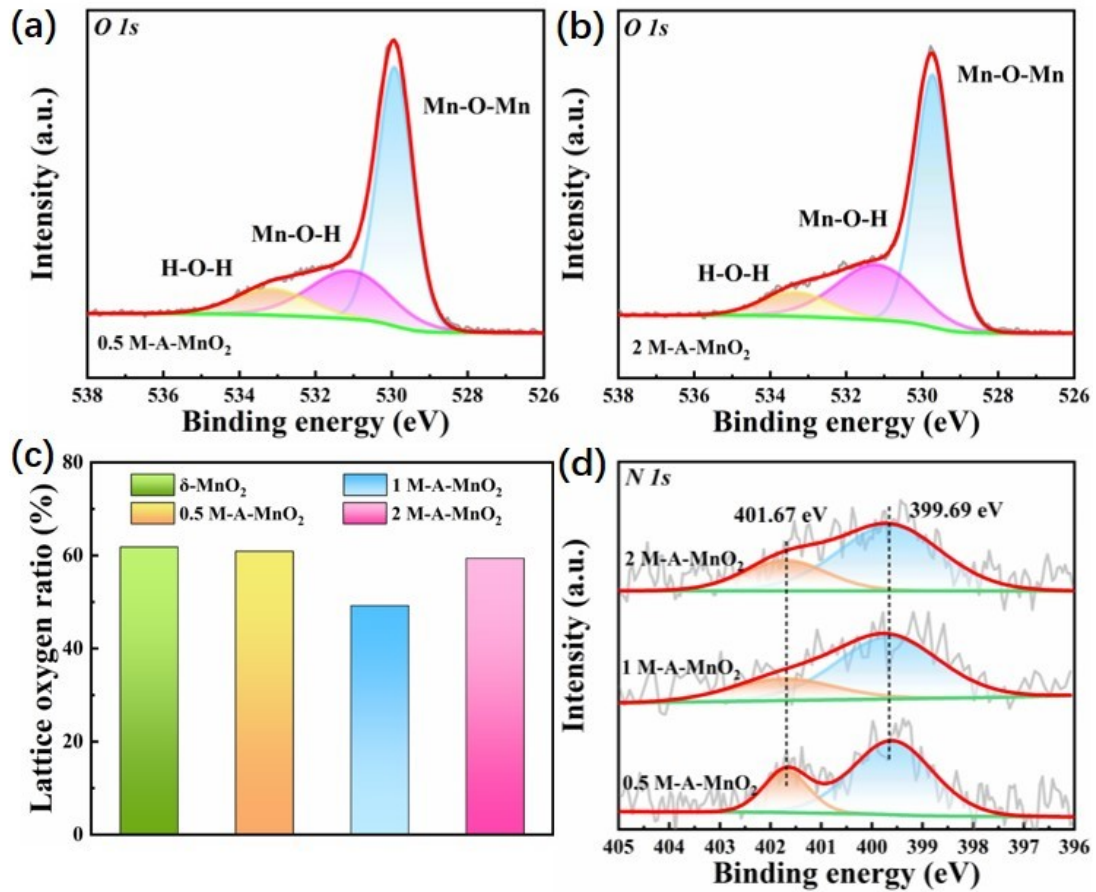

**Fig. S3.** (a-b) O 1s spectra of 0.5 M-A-MnO<sub>2</sub> and 2 M-A-MnO<sub>2</sub>. (c) Ratio of lattice oxygen concentrations for four samples. (d) N 1s spectra of C-A-MnO<sub>2</sub>.

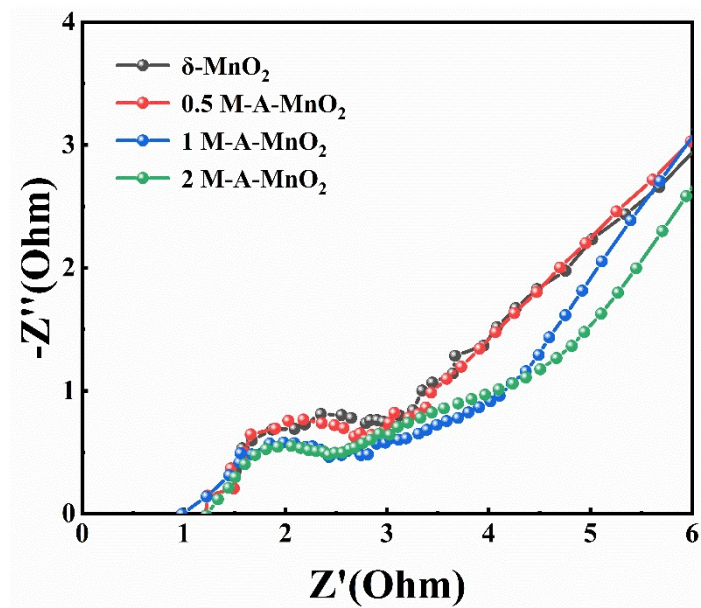

**Fig. S4.** Local magnification of the C-A-MnO<sub>2</sub> impedance spectra.

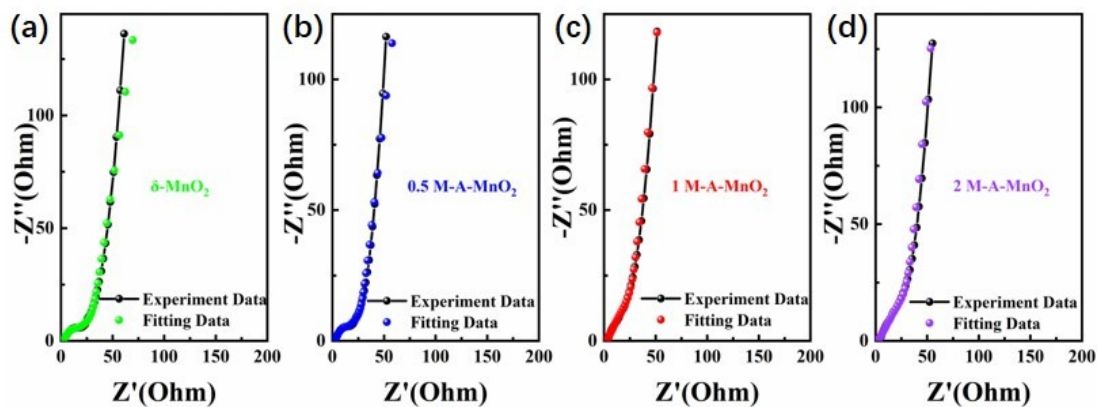

Fig. S5. Impedance fitting results of the C-A-MnO<sub>2</sub>.

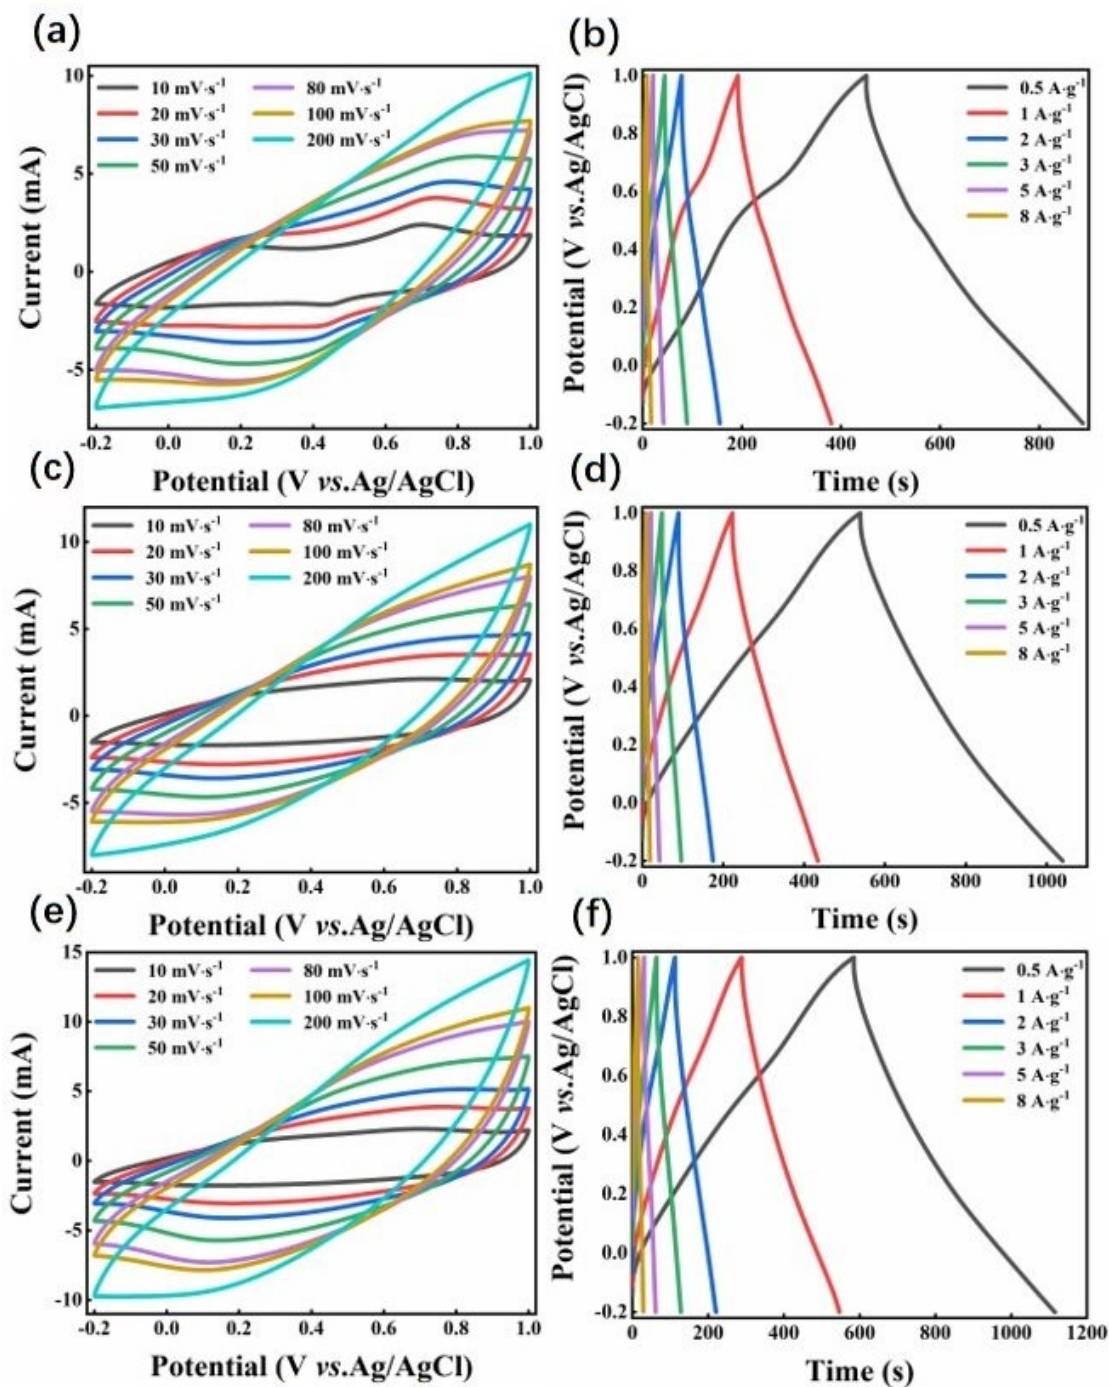

**Fig. S6.** (a) CV and GCD curves of three samples: (a, b)  $\delta$ -MnO<sub>2</sub>. (c, d) 0.5 M-A-MnO<sub>2</sub>. (e, f) 2 M-A-MnO<sub>2</sub>.



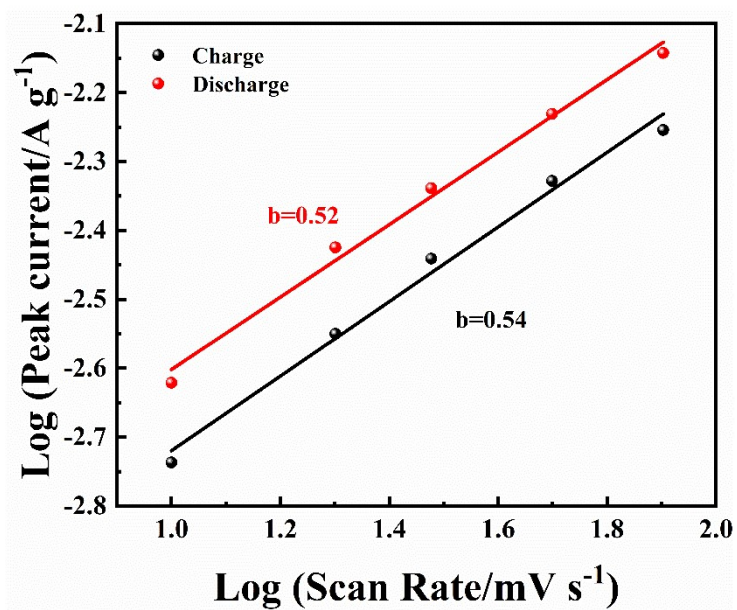

**Fig. S7.** The linear fitting curves of  $\log(i)$  vs  $\log(v)$  according to the CV results in Fig. S6. (a).

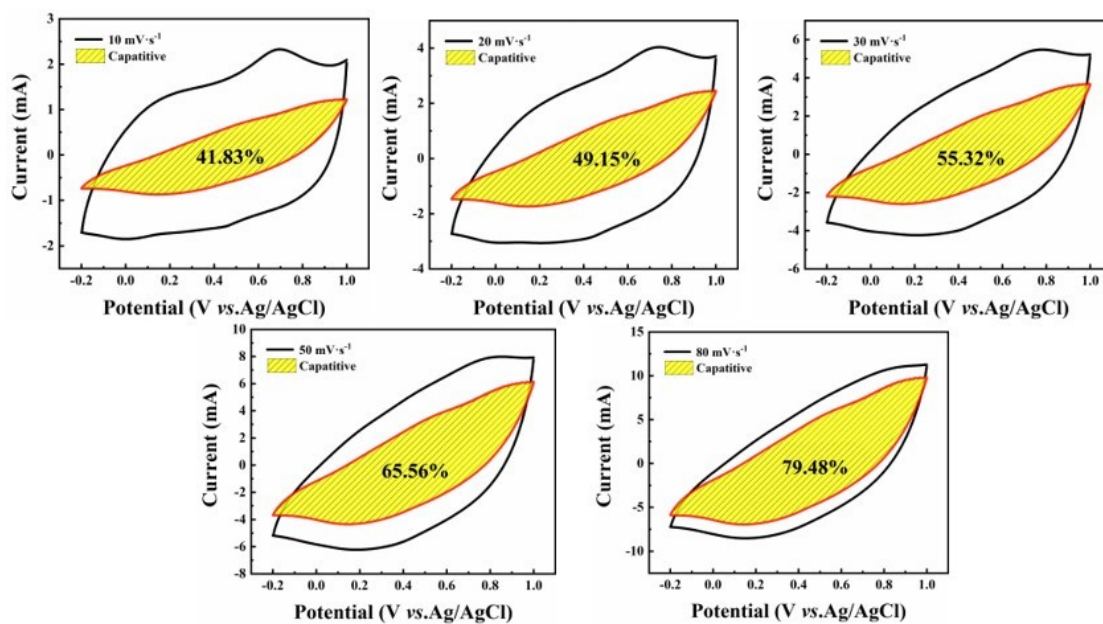

**Fig. S8.** Pseudocapacitive fraction (shown by the shaded area) calculated at a scan rate of 10-80 mV s<sup>-1</sup> from CV curves at different scan rates of A-MnO<sub>2</sub> electrode.

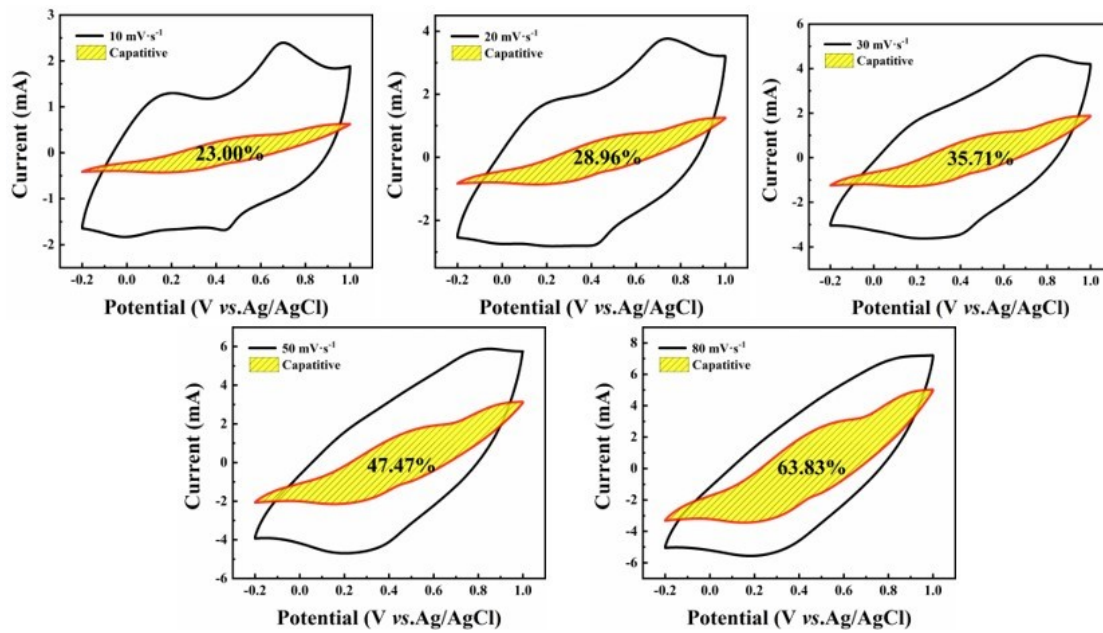

**Fig. S9.** Pseudocapacitive fraction (shown by the shaded area) calculated at a scan rate of 10-80 mV s<sup>-1</sup> from CV curves at different scan rates of  $\delta$ -MnO<sub>2</sub> electrode.

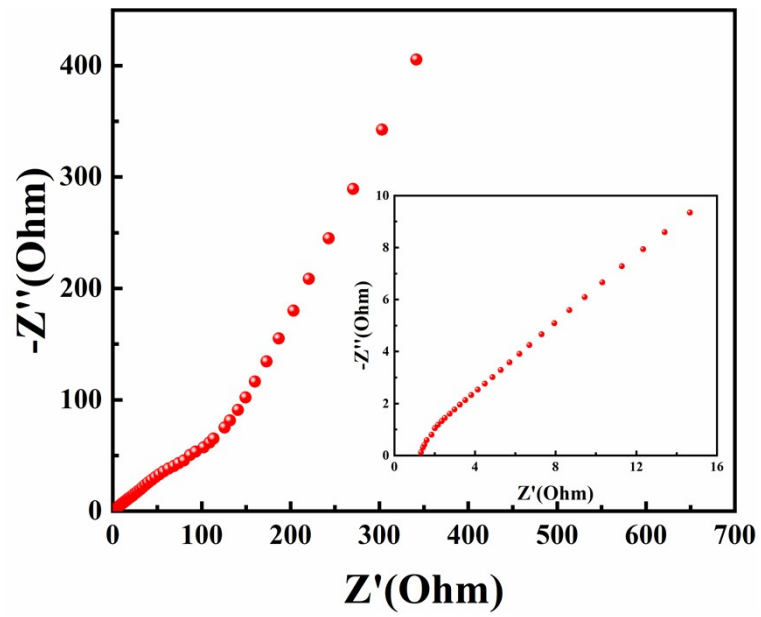

**Fig. S10.** Nyquist plots of A-MnO<sub>2</sub>//La-MoO<sub>3</sub>/GQD ASC device (inset: the Nyquist plots magnified at high frequencies).

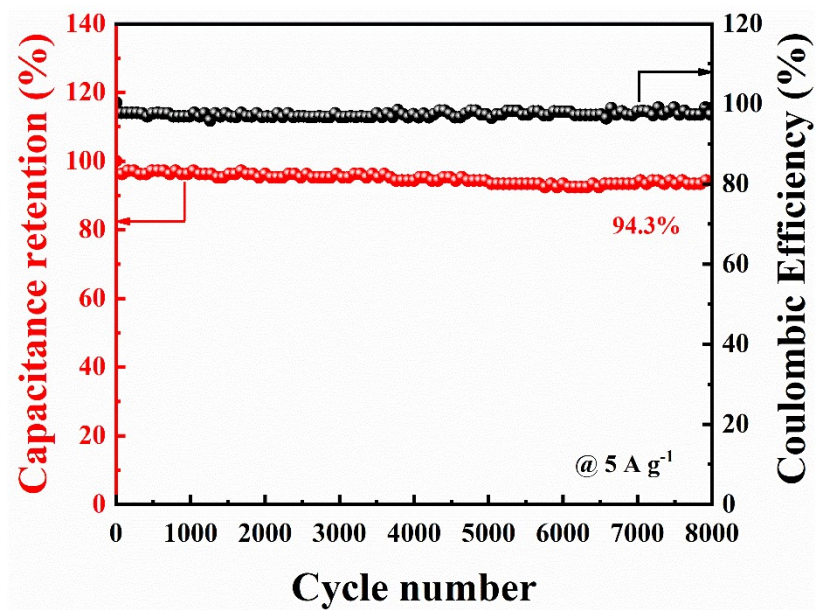

**Fig. S11.** Long cyclic stability tests for 8,000 cycles of A-MnO<sub>2</sub>//La-MoO<sub>3</sub>/GQD.

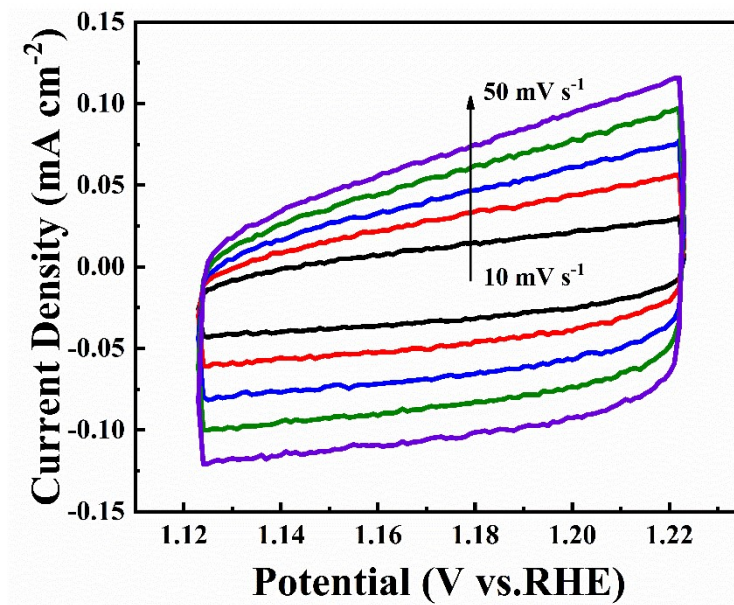

**Fig. S12.** CV curves in the non-Faraday interval with different scan rates of  $\delta$ -MnO<sub>2</sub>.

**Table S1.** Ratio of Mn<sup>3+</sup>/Mn<sup>4+</sup> and O species content (at. %) obtained from XPS spectra of O 1s.

| <b>Sample</b>              | <b>Mn<sup>3+</sup>/Mn<sup>4+</sup></b> | <b>Mn-O-Mn</b> | <b>Mn-O-H</b> | <b>H-O-H</b> |
|----------------------------|----------------------------------------|----------------|---------------|--------------|
| $\delta$ -MnO <sub>2</sub> | 1.84                                   | 61.8%          | 23.2%         | 15.0%        |
| 0.5 M-A-MnO <sub>2</sub>   | 2.86                                   | 60.9%          | 25.9%         | 13.1%        |
| 1 M-A-MnO <sub>2</sub>     | 3.25                                   | 49.2%          | 31.1%         | 19.6%        |
| 2 M-A-MnO <sub>2</sub>     | 3.11                                   | 59.4%          | 29.5%         | 10.9%        |

**Table S2.** Specific surface area and pore characteristics of the C-A-MnO<sub>2</sub>.

| <b>Sample</b>            | <b>Surface Area<br/>(m<sup>2</sup> g<sup>-1</sup>)</b> | <b>Pore Diameter<br/>(nm)</b> | <b>Pore Volume<br/>(cm<sup>3</sup> g<sup>-1</sup>)</b> |
|--------------------------|--------------------------------------------------------|-------------------------------|--------------------------------------------------------|
| δ-MnO <sub>2</sub>       | 91.043                                                 | 3.824                         | 0.481                                                  |
| 0.5 M-A-MnO <sub>2</sub> | 158.740                                                | 3.815                         | 0.824                                                  |
| 1 M-A-MnO <sub>2</sub>   | 372.344                                                | 3.814                         | 1.786                                                  |
| 2 M-A-MnO <sub>2</sub>   | 157.777                                                | 3.814                         | 0.804                                                  |



**Table S3.** Comparison of electrochemical properties of A-MnO<sub>2</sub> samples.

| <b>Electrode</b>                                 | <b>Specific capacitance<br/>(F g<sup>-1</sup>)</b> | <b>Electrolyte</b>                    | <b>Current density</b> | <b>Ref.</b> |
|--------------------------------------------------|----------------------------------------------------|---------------------------------------|------------------------|-------------|
| MnO <sub>2</sub> -R                              | 181.70                                             | 1 M Na <sub>2</sub> SO <sub>4</sub>   | 0.5 A g <sup>-1</sup>  | [1]         |
| CuO/MnO <sub>2</sub>                             | 228.00                                             | 1 M Na <sub>2</sub> SO <sub>4</sub>   | 0.25 A g <sup>-1</sup> | [2]         |
| MnO <sub>2</sub> -b                              | 212.68                                             | 0.5 M Na <sub>2</sub> SO <sub>4</sub> | 3 mA cm <sup>-2</sup>  | [3]         |
| MnO <sub>x</sub> -CM                             | 224.60                                             | 1 M Na <sub>2</sub> SO <sub>4</sub>   | 0.2 A g <sup>-1</sup>  | [4]         |
| D-MnO <sub>2</sub>                               | 202.00                                             | 1 M Na <sub>2</sub> SO <sub>4</sub>   | 1 A g <sup>-1</sup>    | [5]         |
| MnO <sub>2</sub> /La <sub>2</sub> O <sub>3</sub> | 245.40                                             | 1 M Na <sub>2</sub> SO <sub>4</sub>   | 0.3 A g <sup>-1</sup>  | [6]         |
| C/MnO <sub>2</sub>                               | 128.75                                             | 1 M Na <sub>2</sub> SO <sub>4</sub>   | 0.5 A g <sup>-1</sup>  | [7]         |
| MnO <sub>2</sub> -1H                             | 222.50                                             | 1 M Na <sub>2</sub> SO <sub>4</sub>   | 0.5 A g <sup>-1</sup>  | [8]         |
| 1 M-A-MnO <sub>2</sub>                           | 252.20                                             | 1 M Li <sub>2</sub> SO <sub>4</sub>   | 0.5 A g <sup>-1</sup>  | This work   |

**Table S4.** Literature data on OER activity of MnO<sub>2</sub>-based electrocatalysts.

| <b>Catalysts</b>                                      | <b>Electrolyte</b> | <b>Tafel slope<br/>(mV dec<sup>-1</sup>)</b> | <b><math>\eta</math>(mV)<i>@j</i><br/>(mA cm<sup>-2</sup>)</b> | <b>Ref.</b> |
|-------------------------------------------------------|--------------------|----------------------------------------------|----------------------------------------------------------------|-------------|
| Co <sub>3</sub> O <sub>4</sub> -MnO <sub>2</sub> -CNT | 0.1 M KOH          | 66                                           | 420@10                                                         | [9]         |
| $\alpha$ -MnO <sub>2</sub> -NWN                       | 1 M KOH            | 65.6                                         | 467@10                                                         | [10]        |
| $\alpha$ -MnO <sub>2</sub>                            | 1 M KOH            | 87.7                                         | 490@10                                                         | [11]        |
| $\beta$ -MnO <sub>2</sub>                             | 1 M NaOH           | 90                                           | 550@10                                                         | [12]        |
| Ni-MnO <sub>2</sub>                                   | 0.1 M KOH          | 86                                           | 445@10                                                         | [13]        |
| Al-MnO <sub>2</sub>                                   | 1 M KOH            | 107.9                                        | 390@10                                                         | [14]        |
| Fe-MnO <sub>2</sub>                                   | 1 M KOH            | 158.1                                        | 449@10                                                         | [14]        |
| 1 M-A-MnO <sub>2</sub>                                | 1 M KOH            | 61                                           | 361@10                                                         | This work   |

## References

- [1] D. Zhang, J. Dai, J. Zhang, Y. Zhang, H. Liu, Y. Xu, J. Wu, P. Li, *ACS Omega* **2024**, *9*, 18032-18045.
- [2] Z. Zhang, C. Ma, M. Huang, F. Li, S. Zhu, C. Hua, L. Yu, H. Zheng, X. Hu, Y. Zhang, *Journal of Materials Science: Materials in Electronics* **2015**, *26*, 4212-4220.
- [3] W. Yang, H. Eraky, C. Zhang, A. P. Hitchcock, I. Zhitomirsky, *Chemical Engineering Journal* **2024**, *483*, 149391.
- [4] L. Ding, Z. Li, L. Chen, Z. Qi, *Electrochimica Acta* **2023**, *455*, 142424.
- [5] Y.-P. Zhu, C. Xia, Y. Lei, N. Singh, U. Schwingenschlögl, H. N. Alshareef, *Nano Energy* **2019**, *56*, 357-364.
- [6] Y. Li, B. Guan, A. Maclennan, Y. Hu, D. Li, J. Zhao, Y. Wang, H. Zhang, *Electrochimica Acta* **2017**, *241*, 395-405.
- [7] P. Li, J. Wu, L. Tang, H. Liu, Y. Xu, D. Zhang, *Ionics* **2023**, *29*, 3629-3639.
- [8] K. O. Oyedotun, A. A. Mirghni, O. Fasakin, D. J. Tarimo, B. A. Mahmoud, N. Manyala, *Journal of Energy Storage* **2021**, *36*, 102419.
- [9] D. Ye, T. Wu, H. Cao, Y. Wang, B. Liu, S. Zhang, J. Kong, *RSC Advances* **2015**, *5*, 26710-26715.
- [10] Y. Chen, S. Yang, H. Liu, W. Zhang, R. Cao, *Chinese Journal of Catalysis* **2021**, *42*, 1724-1731.
- [11] Y. Meng, W. Song, H. Huang, Z. Ren, S.-Y. Chen, S. L. Suib, *Journal of the American Chemical Society* **2014**, *136*, 11452-11464.
- [12] M. Fekete, R. K. Hocking, S. L. Y. Chang, C. Italiano, A. F. Patti, F. Arena, L. Spiccia, *Energy & Environmental Science* **2013**, *6*, 2222-2232.
- [13] K. Bera, A. Karmakar, K. Karthick, S. S. Sankar, S. Kumaravel, R. Madhu, S. Kundu, *Inorganic Chemistry* **2021**, *60*, 19429-19439.
- [14] H. Sun, S. Chen, B. Zhang, J. Wang, J. Yao, D. Li, G. Yuan, *Dalton Transactions* **2023**, *52*, 17407-17415.
